# Supplementary material for: A nanowire-on-microrod polyaniline@FeS2 hybrid as the cathode in high-performance Al-ion batteries
Source: Royal Society of Chemistry journal article supplement (doi:10.1039/d3cc03384h), 2023-01-01
Supplement: d3cc03384h2.pdf [file d3cc03384h2.pdf]

Electronic Supplementary Information (ESI) for Chemical Communications. This journal is (c) The Royal Society of Chemistry 2023.

Electronic Supplementary Information (ESI)

## **A nanowire-on-microrod polyaniline@FeS<sub>2</sub> hybrid as cathode in high-performance Al-ion batteries**

Haiyuan Bai<sup>a</sup>, Jing Xu<sup>a</sup>, Jinyun Liu<sup>a</sup>, Tianli Han<sup>\*,a</sup>, Junjie Niu<sup>\*,b</sup>

### **Experimental section**

**Preparation of MIL-88A:** Firstly, 0.518 g of fumaric acid (AR, 99.5%, Aladdin) was added to 75 mL of deionized water and stirred (DF-101S, LICHEN, 1000r/min) in a water bath (DF-101S, LICHEN) at 70 °C for 15 min to form the solution A. Subsequently, 1.192 g of Fe(NO<sub>3</sub>)<sub>3</sub>·9H<sub>2</sub>O (AR, 98.5%, Macklin) was dissolved in 13 mL deionized water to form the solution B. Then the solution B was mixed with solution A under stirring in a 70 °C water bath for 30 min. Then the mixture was added into a Teflon liner (50 mL, BK) in an autoclave (JINGHONG, 135 L) at 110 °C for 6 h. The collected precipitate was centrifuged (TG16G, 7000r/min) with deionized water and ethanol for 3 times. Finally the obtained sample was dried 12 h at 70 °C (JINGHONG, 135 L).

**Preparation of FeS<sub>2</sub> microrods:** 3.0 g of sulfur powder (AR, 99.5%, Aladdin) was placed in a ceramic boat that was located at the upstream of a tube furnace (OTF-1200X, HF-Kejing). In parallel, 0.15 g of as-prepared MIL-88A was placed in the downstream. Before heating, the furnace was pumped by a rotary vacuum pump (VALUE, FY-1C-N) to reach a pressure of 2.0 Pa with oxygen less than 0.01 ppm. Then the furnace was heated to 450 °C for 1.0 h under Ar (XC-Liyuan, 99.999%). After the furnace was cooled down to room temperature, the sample was collected.

**Preparation of the PANI@FeS<sub>2</sub> hybrid:** The PANI nanowires were coated on the as-prepared FeS<sub>2</sub> microrods in an ice bath (DF-101S, LICHEN). In a typical experiment, 0.1 g of FeS<sub>2</sub> microrods was dispersed in a 60 mL solution with 0.5 mol L<sup>-1</sup> H<sub>2</sub>SO<sub>4</sub> under stirring (DF-101S, LICHEN) at -5 °C. Then 0.355 mL of aniline (AR, 99.5%, Aladdin) was added. In parallel, 0.568 g of ammonium persulfate (AR, 98%, Aladdin) was added to a 40 mL solution with 0.5 mol L<sup>-1</sup> H<sub>2</sub>SO<sub>4</sub>, which was mixed with the FeS<sub>2</sub> microrods solution. After magnetically stirring (DF-101S, LICHEN) for 10 h, the sample was centrifuged and rinsed by deionized water and ethanol for 3 times. After drying at 70 °C overnight, the PANI@FeS<sub>2</sub> hybrid was prepared for battery assembly.

**Characterizations:** Crystal structure of the sample was analyzed by X-ray diffractometer (XRD SMART APEX II Brook, Cu K $\alpha$  X-ray wavelength=1.5418 Å). Scanning electron microscope (SEM, Hitachi 8100, 5 KV) and transmission electron microscope (TEM, Hitachi HT-7700, 120 KV) were applied to check the sample morphology. The lattice fringes of the sample were obtained by using high-resolution TEM (HRTEM, TecnaiG220S-Twin, 200 KV). The chemical composition of the sample was verified by using energy dispersive X-ray spectroscopy (EDX, Hitachi 8100, 15 KV). The bonding energy of the sample was checked by using X-ray photoelectron spectroscopy (XPS, EscalAB250, Al K $\alpha$  hv=1486.6 eV). The functional groups of the sample were checked by Fourier Transform infrared spectroscopy (FTIR-21, SHIMADZU). The BET surface area of the sample was measured by nitrogen at 77 K by ASAP Micromeritics Tristar 2460 instrument. Thermogravimetric analysis (TGA) was performed under N<sub>2</sub> on a thermogravimetric analyzer (NETZSCH, STA-2500).

**Electrochemical property and battery tests:** First, 70 wt% PANI@FeS<sub>2</sub> hybrid and 20 wt% conductive carbon black were mixed for 30 min, then 10 wt% polyvinylidene fluoride was added as a binder. Subsequently, a slurry was formed by adding 0.5 mL of N-methylpyrrolidone (NMP, 99.99%). Then the slurry was stirred under 1200 r/min by an agitator (MYP13-2, CHIJIU). After stirring for 8 h, the slurry was coated on a carbon paper via drop casting with a thickness of about 200  $\mu$ m. Then the sample was dried in a vacuum oven (JINGHONG, 70 L) at 80 °C for 24 h. The dried sample was cut into a circular disc with a diameter of 12 mm, which

was used as cathode electrode. A molybdenum sheet (QingYuan, 99.99%, 0.02 mm) with a diameter of 20 mm and a thickness of 0.02  $\mu\text{m}$  was used to prevent the cell from electrolyte corrosion. A pure aluminum sheet (QiRui, 99.99%, 0.5 mm) was used as anode electrode. A glass fiber membrane (Whatman, GF/D, 0.5 mm) was used as separator.  $\text{AlCl}_3$  in  $[\text{EMIm}]\text{Cl}$  (DoDoChem) with a molar ratio of 1.3:1 was used as ionic electrolyte. A CR-2032 coin cell was assembled inside an Ar-filled glove box (MIKROUNA, Super1220/750/900) with less than 0.01 ppm of moisture and oxygen. The electrochemical property was checked after resting for 12 h. The battery cycling performance was tested on a battery tester (NEWARE) in the potential range of 0.01-1.9 V. Reaction resistance was investigated by using galvanostatic intermittent titration technique (GITT, NEWARE). Cyclic voltammetry (CV) was tested by an electrochemical workstation (CHI660e, 0.01-1.9 V).

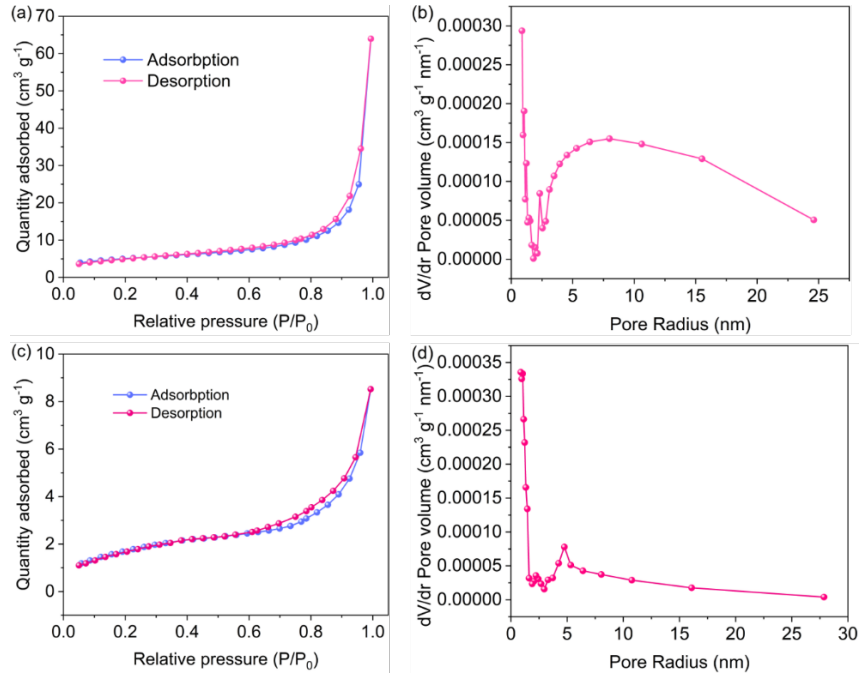

**Fig. S1.** (a) N<sub>2</sub> adsorption-desorption isotherms and (b) pore-size distribution of the PANI@FeS<sub>2</sub> hybrid. (c) N<sub>2</sub> adsorption-desorption isotherms and (b) pore-size distribution of the pure FeS<sub>2</sub>.

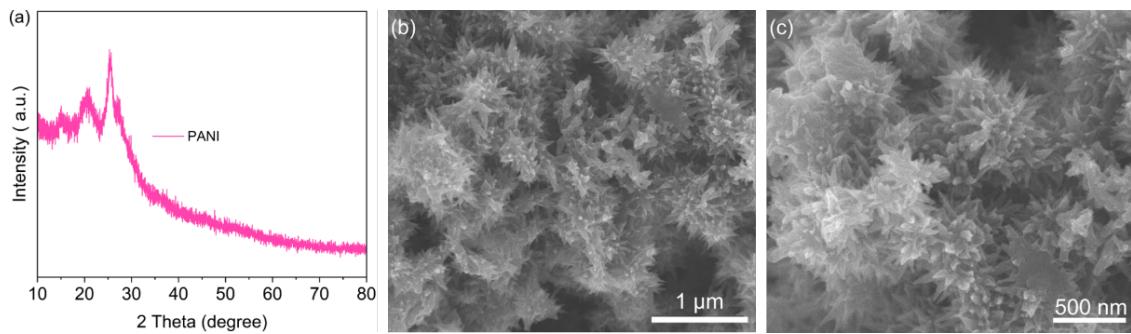

**Fig. S2.** (a) XRD pattern and (b,c) SEM images of pure PANI.

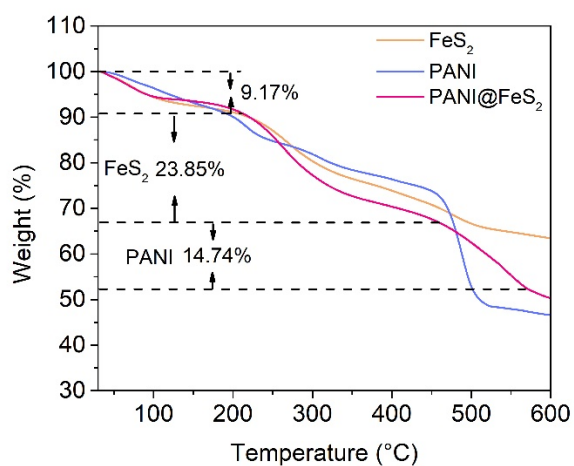

**Fig. S3.** TGA curves of FeS<sub>2</sub>, PANI and PANI@FeS<sub>2</sub> hybrid.

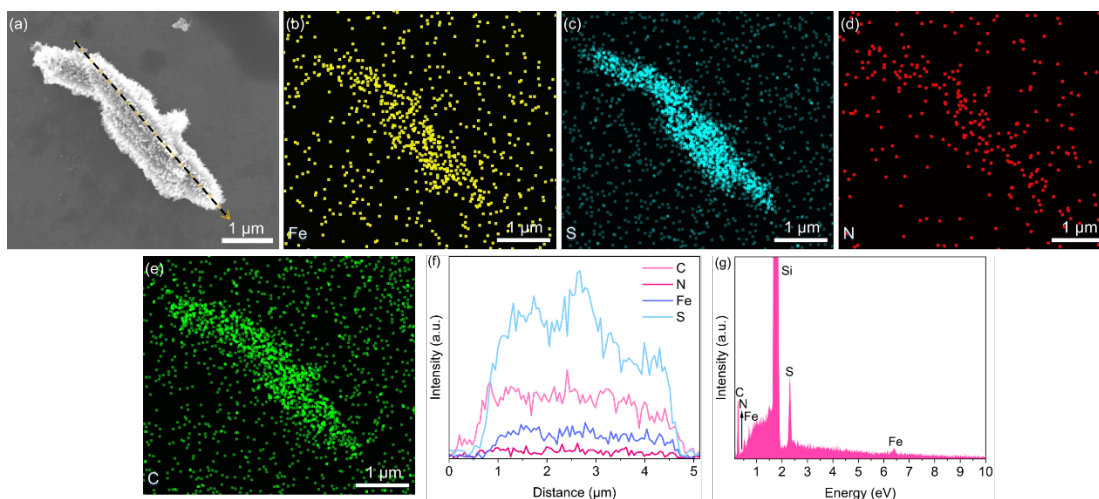

**Fig. S4.** (a) SEM morphology and (b-e) the corresponding elemental mappings of the as-obtained PANI@FeS<sub>2</sub> hybrid. (f) Line-scanning and (g) EDS spectrum of the PANI@FeS<sub>2</sub>.

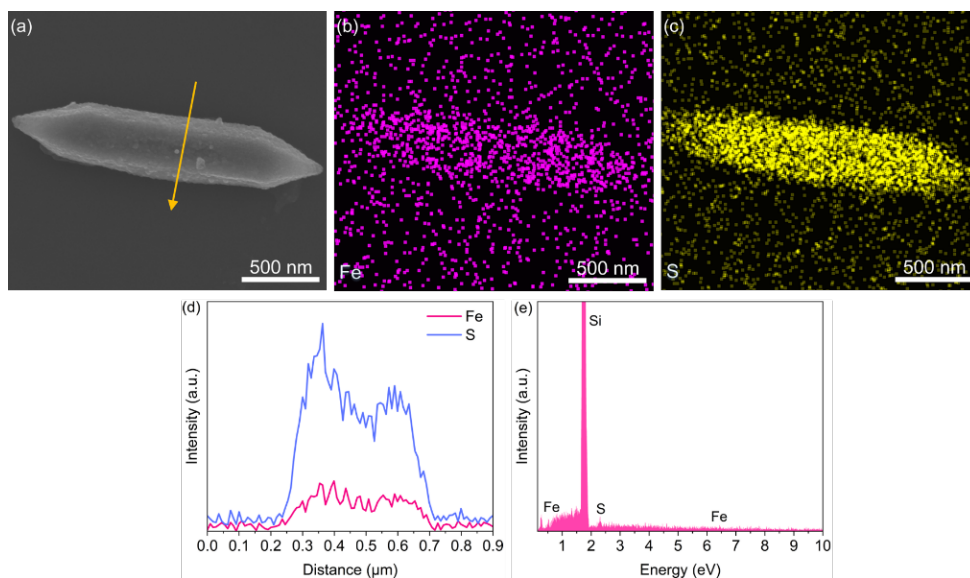

**Fig. S5.** (a) SEM morphology, (b,c) the corresponding elemental mappings, (d) line-scanning, and (e) EDS spectrum of pure FeS<sub>2</sub> microrod.

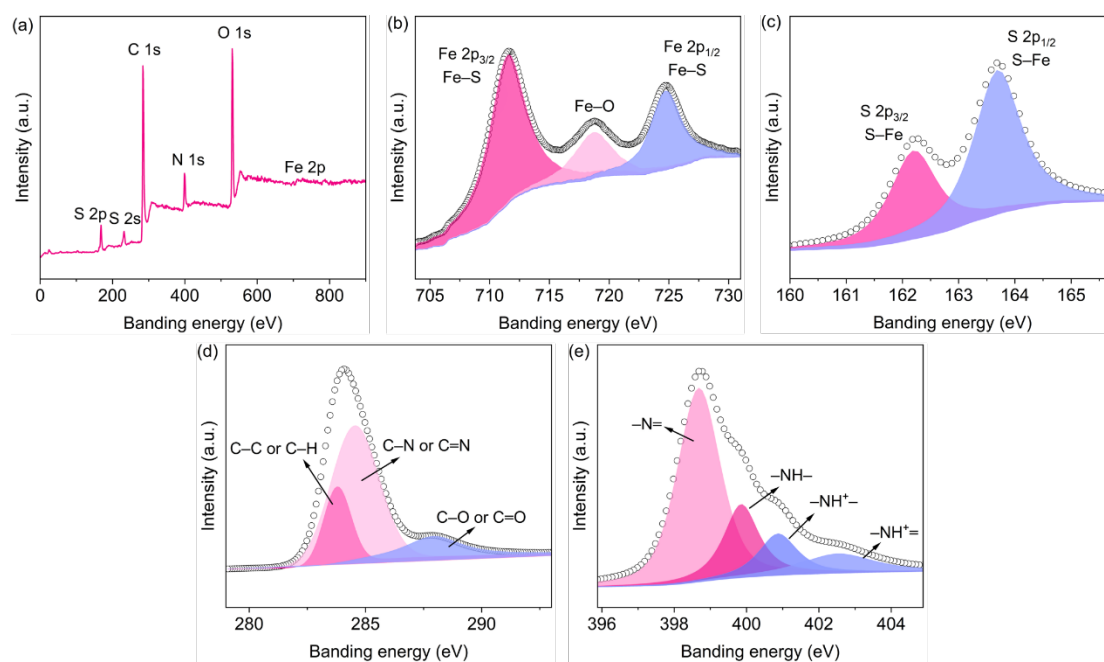

**Fig. S6.** (a) Full spectrum survey, (b) Fe 2p, (c) S 2p, (d) C 1s, and (e) N 1s XPS spectra of the PANI@FeS<sub>2</sub>.

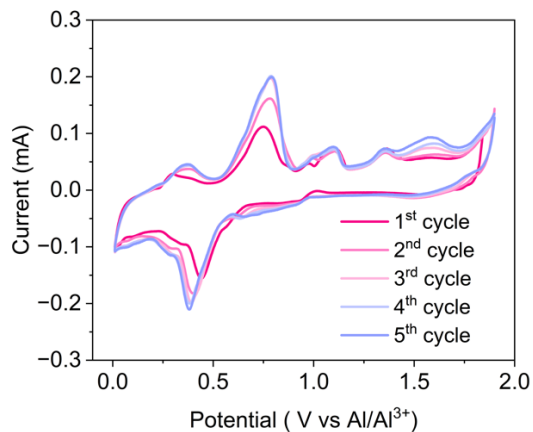

**Fig. S7.** CV curves of pure FeS<sub>2</sub> microrods. The scanning rate was 0.1 mV s<sup>-1</sup>.

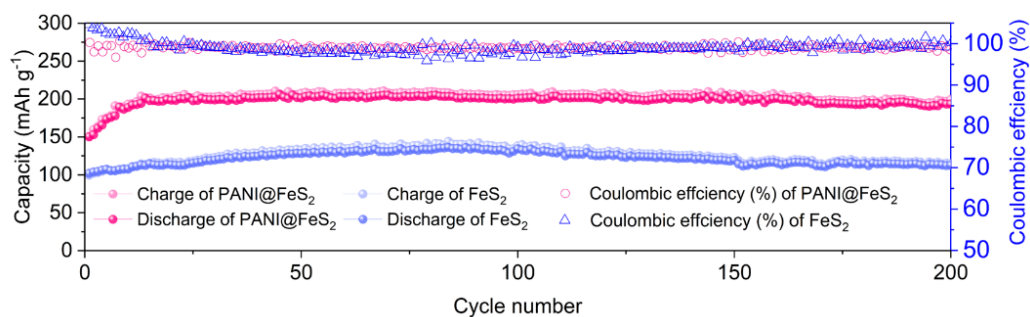

**Fig. S8.** Cycling performance of PANI@FeS<sub>2</sub> hybrid and pure FeS<sub>2</sub> microrods at 1.0 A g<sup>-1</sup>.

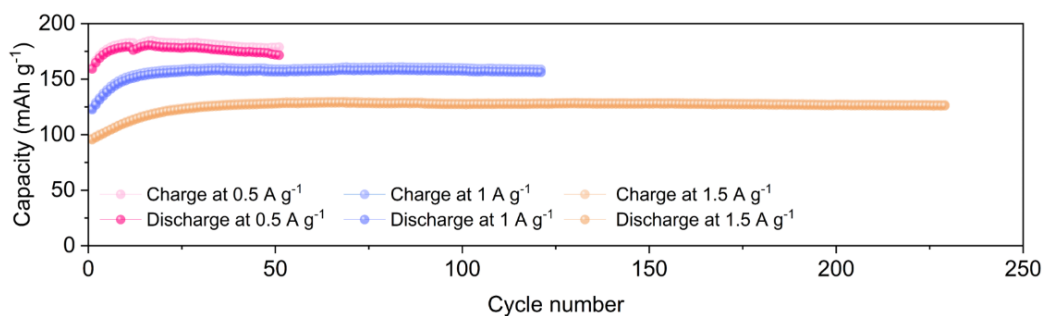

**Fig. S9.** Cycling performance of the battery with PANI as cathode at 0.5, 1, and 1.5 A g<sup>-1</sup>.

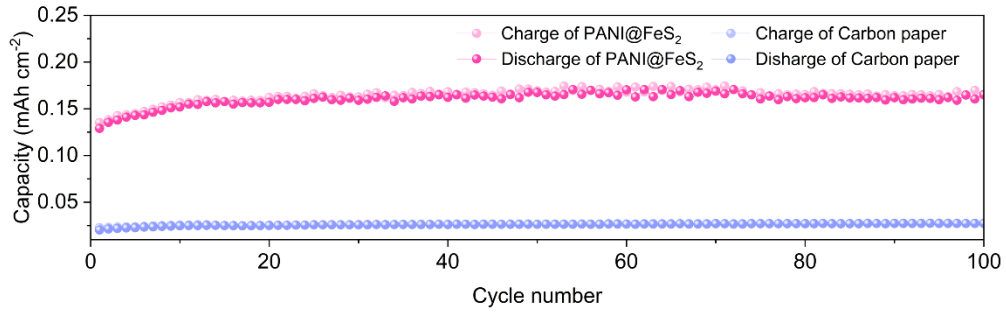

**Fig. S10.** Cycling performance of the PANI@FeS<sub>2</sub> hybrid and carbon paper at 1.0 mA cm<sup>-2</sup>.

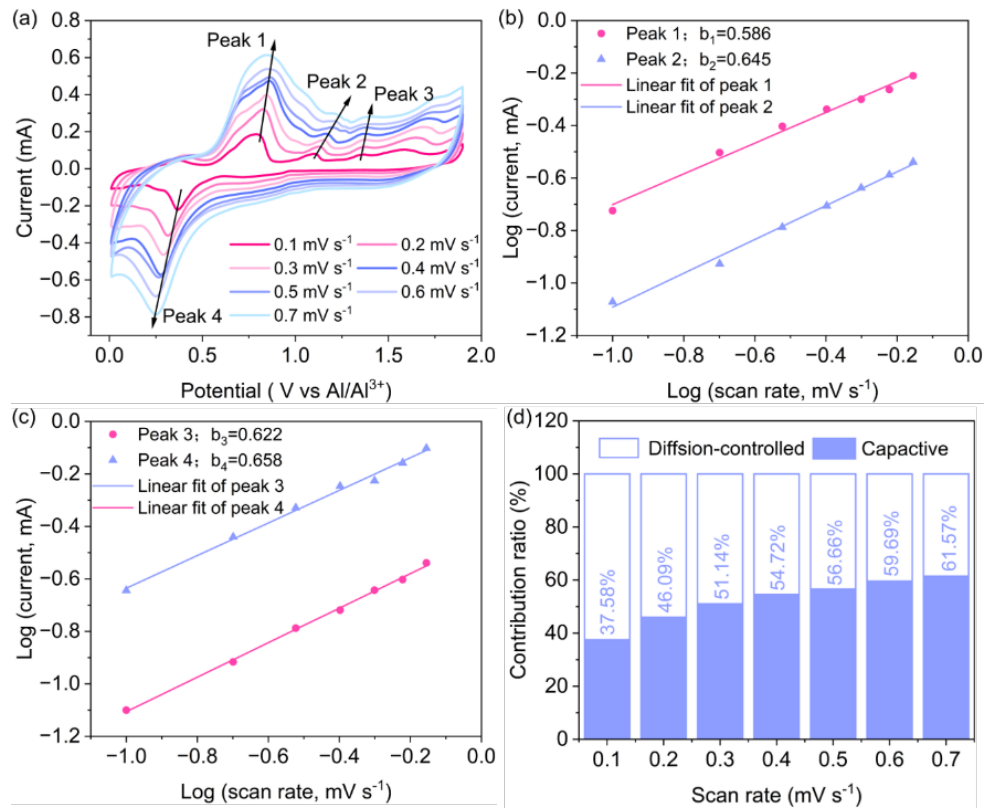

**Fig. S11.** (a) CV curves of pure FeS<sub>2</sub> cathode with scanning rates from 0.1 to 0.7 mV s<sup>-1</sup>. (b, c) the log(*i*) vs. log(*v*) of oxidization and reduction peaks. (d) Contribution ratio of capacitive and diffusion-control processes.



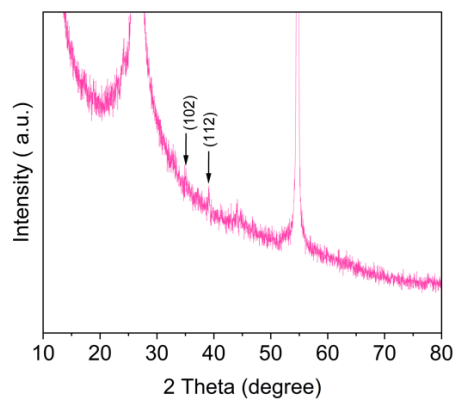

**Fig. S12.** XRD pattern of the PANI@FeS<sub>2</sub> hybrid after 100 cycles at 1.0 A g<sup>-1</sup>.

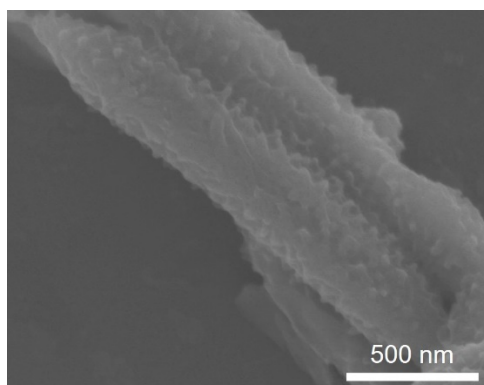

**Fig. S13.** SEM morphology of the PANI@FeS<sub>2</sub> hybrid after discharge at 1.5 A g<sup>-1</sup>.

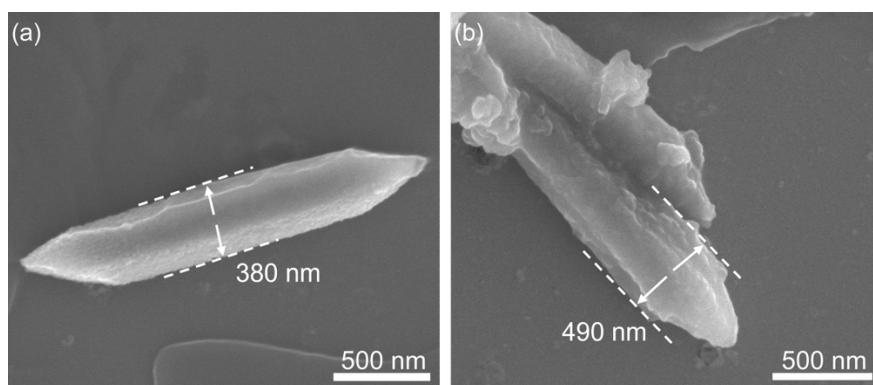

**Fig. S14.** SEM morphologies of FeS<sub>2</sub> (a) before and (b) after Al<sup>3+</sup> ion insertion at 1.5 A g<sup>-1</sup>.

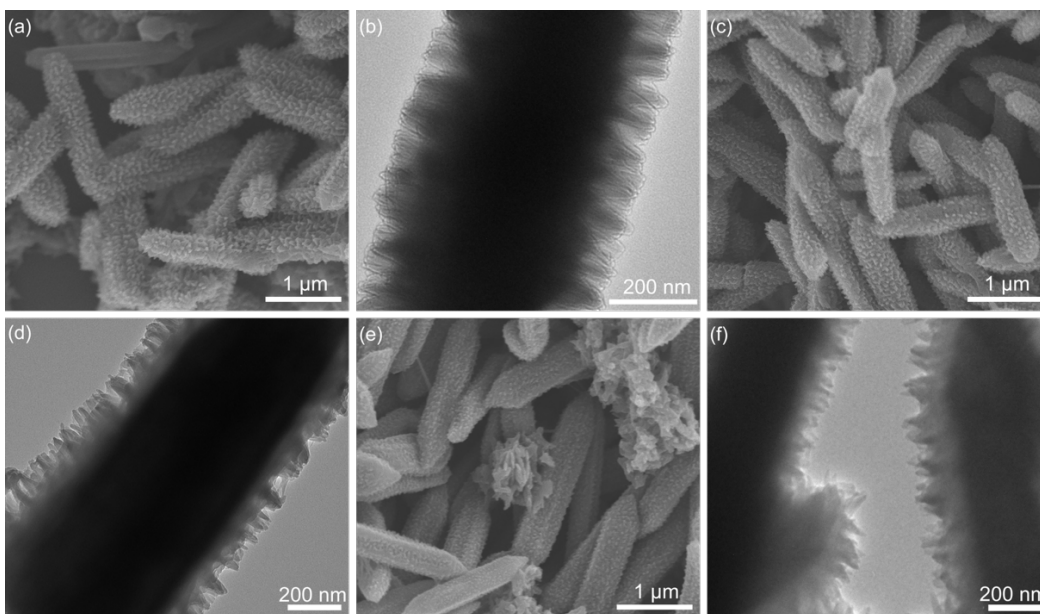

**Fig. S15.** SEM and TEM images of PANI@FeS<sub>2</sub> hybrid prepared by using (a, b) 0.284, (c, d) 0.355 and (e, f) 0.426 mL of aniline.

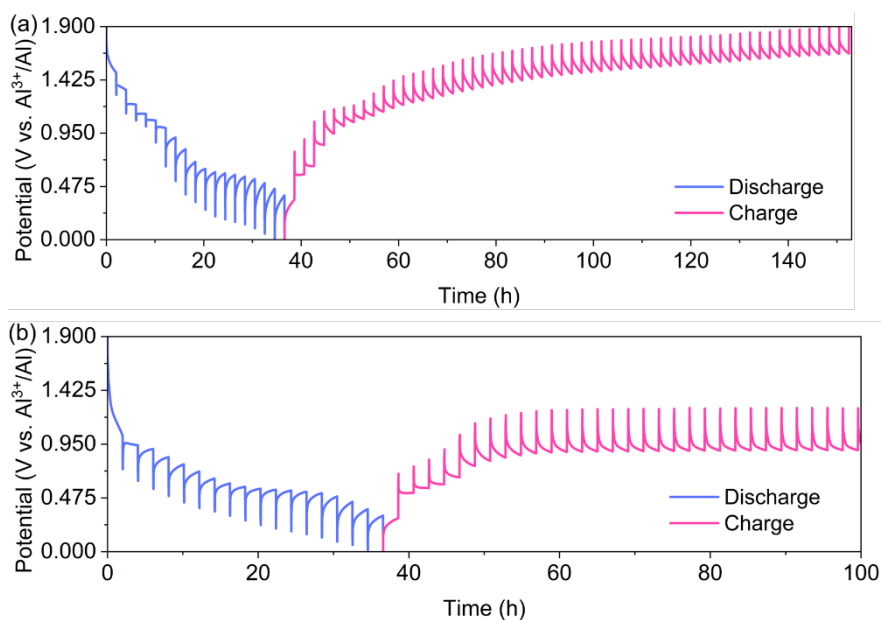

**Fig. S16.** GITT time-potential distributions of (a) the PANI@FeS<sub>2</sub> hybrid and (b) FeS<sub>2</sub> microrods.

**Table S1.** Comparison of battery performance with various cathode materials.

| Materials                                          | Current density (A g <sup>-1</sup> ) | Cycle number | Capacity (mAh g <sup>-1</sup> ) | Ref.      |
|----------------------------------------------------|--------------------------------------|--------------|---------------------------------|-----------|
| Ni <sub>2</sub> CoS <sub>4</sub> nanosheets        | 0.1                                  | 100          | 143.8                           | 1         |
| TiO <sub>2</sub> nanorods                          | 0.5                                  | 150          | 91                              | 2         |
| Co <sub>3</sub> O <sub>4</sub> @MWCNTs polyhedrons | 0.1                                  | 150          | 125                             | 3         |
| MoO <sub>2</sub> @Ni                               | 0.1                                  | 100          | 90                              | 4         |
| Mo <sub>6</sub> S <sub>8</sub> nano-blocks         | 0.04                                 | 100          | 66.7                            | 5         |
| VS <sub>2</sub> nanosheets                         | 0.1                                  | 50           | 59.4                            | 6         |
| G-VS <sub>2</sub> nanosheets                       | 0.1                                  | 50           | 88.3                            | 6         |
| V <sub>2</sub> CT <sub>x</sub> nanosheets          | 0.1                                  | 100          | 90                              | 7         |
| CoS <sub>2</sub> @CNTs                             | 0.1                                  | 100          | 60                              | 8         |
| SnSe nanoparticles                                 | 0.3                                  | 100          | 107                             | 9         |
| Cu <sub>2-x</sub> Se nanorods                      | 0.2                                  | 100          | 100                             | 10        |
|                                                    | 0.5                                  | 100          | 238.7                           |           |
| Nanowire-on-nanorod PANI@FeS <sub>2</sub> hybrid   | 1                                    | 200          | 193.4                           | This work |
|                                                    | 1.5                                  | 500          | 152.8                           |           |

## References

- 1 S. Li, J. Tu, G. Zhang, M. Wang and S. Jiao, *J. Electrochem. Soc.*, 2018, **165**, A3504-A3509.
- 2 S. Wang, K. V. Kravchyk, S. Pigeot-Remy, W. Tang, F. Krumeich, M. Wörle, M. I. Bodnarchuk, S. Cassaignon, O. Durupthy, S. Zhao, C. Sanchez and M. V. Kovalenko,

- ACS Appl. Nano Mater.*, 2019, **2**, 6428-6435.
- 3 X. Xiao, M. Wang, J. Tu, Y. Luo and S. Jiao, *ACS Sustain. Chem. Eng.*, 2019, **7**, 16200-16208.
- 4 J. Wei, W. Chen, D. Chen and K. Yang, *J. Electrochem. Soc.*, 2017, **164**, A2304-A2309.
- 5 L. Geng, G. Lv, X. Xing and J. Guo, *Chem. Mater.*, 2015, **27**, 4926-4929.
- 6 L. Wu, R. Sun, F. Xiong, C. Pei, K. Han, C. Peng, Y. Fan, W. Yang, Q. An and L. Mai, *Phys. Chem. Chem. Phys.*, 2018, **20**, 22563-22568.
- 7 A. VahidMohammadi, A. Hadjikhani, S. Shahbazmohamadi and M. Beidaghi, *ACS Nano*, 2017, **11**, 11135-11144.
- 8 K. Zhang, T. H. Lee, J. Cha, H. Jang, M. Shokouhimehr and J. W. Choi, *Electron. Mater. Lett.*, 2019, **15**, 727-732.
- 9 Y. Zhang, B. Zhang, J. Li, J. Liu, X. Huo and F. Kang, *Chem. Eng. J.*, 2021, **403**, 126377.
- 10 J. Jiang, H. Li, T. Fu, B. Hwang, X. Li and J. Zhao, *ACS Appl. Mater. Interfaces*, 2018, **10**, 17942-17949.
